# Supplementary material
Source: publisher figshare collection journal article supplement (https://diabetesjournals.figshare.com/articles/dataset/_/24112467)
Supplement: Supplementary file 1 [file 1]

## Appendix 2. Multivariable logistic regression models of association of migrant-status with barriers to healthcare

| Predictor                                | Unadjusted OR (95% CI) | Model 1<br>adjusted OR<br>(95% CI) <sup>a</sup> | Model 2<br>adjusted OR (95% CI) <sup>b</sup> |
|------------------------------------------|------------------------|-------------------------------------------------|----------------------------------------------|
| Migrant status<br>Non-migrant (ref.)     | 1.00                   | 1.00                                            | 1.00                                         |
| Migrant                                  | 1.08 (0.87 – 1.36)     | 1.08 (0.87 – 1.36)                              | 0.98 (0.79 – 1.21)                           |
| Age<br>18-39 (ref.)                      |                        | 1.00                                            | 1.00                                         |
| 40-59                                    |                        | 0.91 (0.79 – 1.04)                              | 1.02 (0.98 – 1.18)                           |
| 60+                                      |                        | 0.59 (0.43 – 0.81)                              | 0.75 (0.54 – 1.05)                           |
| Gender<br>Male (ref.)                    |                        | 1.00                                            | 1.00                                         |
| Female                                   |                        | 1.11 (0.95 – 1.29)                              | 1.05 (0.90 – 1.23)                           |
| Accessed care?<br>No (ref.)              |                        |                                                 | 1.00                                         |
| Yes                                      |                        |                                                 | 1.05 (0.90 – 1.23)                           |
| Insurance Status:<br>No insurance (ref.) |                        |                                                 | 1.00                                         |
| Yes                                      |                        |                                                 | 0.99 (0.97 – 1.00)                           |
| English proficiency<br>None-low (ref.)   |                        |                                                 | 1.00                                         |
| Some-well                                |                        |                                                 | 0.95 (0.77 – 1.18)                           |
| Education level<br>0-8 years             |                        |                                                 | 1.00                                         |
| 9-12 years                               |                        |                                                 | 0.85 (0.73 – 0.99)                           |
| Beyond high school                       |                        |                                                 | 0.67 (0.46 – 0.96)                           |
| Documentation<br>Documented (ref.)       |                        |                                                 | 1.00                                         |
| Undocumented                             |                        |                                                 | 1.87 (1.58 – 2.22)                           |

|                  |  |  |                    |
|------------------|--|--|--------------------|
| Income Category  |  |  |                    |
| <\$20,000 (ref.) |  |  | 1.00               |
| >=\$20,000       |  |  | 0.92 (0.79 – 1.08) |
